# Supplementary material for: High-efficiency inverted organic solar cells with polyethylene oxide-modified Zn-doped TiO2as an interfacial electron transport layer
Source: Royal Society of Chemistry journal article supplement (doi:10.1039/c4nr02780a), 2014-06-05
Supplement: c4nr02780a1.pdf [file c4nr02780a1.pdf]

Cite this: DOI: 10.1039/c0xx00000x

www.rsc.org/xxxxxx

COMMUNICATION

## Supporting Information

### High-Efficiency Inverted Organic Solar Cells with Polyethylene oxide-Modified Zn-doped TiO<sub>2</sub> as Interfacial Electron Transport Layer

M.Thambidurai,<sup>\*a‡</sup> Jun Young Kim,<sup>a‡</sup> Youngjun Ko,<sup>a</sup> Hyung-jun Song,<sup>a</sup> Hyeonwoo Shin,<sup>a</sup> Jiyun Song,<sup>a</sup> Yeonkyung Lee,<sup>a</sup> N.Muthukumarasamy,<sup>b</sup> Dhayalan Velauthapillai,<sup>c</sup> and Changhee Lee<sup>\*a</sup>

<sup>10</sup> <sup>a</sup> Department of Electrical and Computer Engineering, Global Frontier Center for Multiscale Energy Systems, Seoul National University, Seoul 151-744, Republic of Korea. Fax:+82-2877-6668; Tel:+82-2880-9093; E-mail: chlee7@snu.ac.kr (Changhee Lee), E-mail: phy\_thambi@rediffmail.com (M.Thambidurai)

<sup>15</sup> <sup>b</sup> Department of Physics, Coimbatore Institute of Technology, Coimbatore 641 014, India. Fax: +91-0422-2575020; Tel: +91-94429-54202; E-mail: vishnukutty2002@yahoo.co.in

<sup>c</sup> Department of Engineering, University College of Bergen, Bergen, Norway. Fax: +4755587030; Tel: +4755587711; E-mail:Dhayalan.Velauthapillai@hib.no

20

25

30

35

40

45

50

---

## Experimental section

**Synthesis of Polyethylene oxide (PEO)-modified Zn-doped TiO<sub>2</sub> nanocrystalline thin films:** In the present study, PEO-modified Zn-doped TiO<sub>2</sub> nanocrystalline thin films have been prepared using sol-gel spin coating method. Titanium (IV) butoxide (Ti(OCH<sub>2</sub>CH<sub>2</sub>CH<sub>2</sub>CH<sub>3</sub>)<sub>4</sub>) (0.45M) and zinc acetate 5 dihydrate (Zn(CH<sub>3</sub>COO)<sub>2</sub>·2H<sub>2</sub>O) (0.01M) were dissolved in a mixture of 2-methoxyethanol (CH<sub>3</sub>OCH<sub>2</sub>CH<sub>2</sub>OH) and acetylacetone (CH<sub>3</sub>COCH<sub>2</sub>COCH<sub>3</sub>) (0.45M) at room temperature. The resultant solution was stirred for 1h to yield a homogeneous, clear and transparent (light yellowish color) solution using magnetic stirrer. Polyethylene oxide (PEO) (0.01 wt.%, 0.05 wt.%, 0.1 wt.% and 0.3 wt.%) was dissolved in chlorobenzene. The PEO solution was slowly added to Zn-doped TiO<sub>2</sub> sol and was stirred for 2h to obtain the final sol ready for deposition of thin films. The spin coating method was used to prepare thin films of PEO-modified Zn-doped TiO<sub>2</sub> onto ITO substrates using the prepared sol. PEO-modified Zn-doped TiO<sub>2</sub> thin films of thickness 30 nm was formed after post annealing at 500 °C for 1h and these films form the PEO-modified Zn-doped TiO<sub>2</sub> nanocrystalline thin films.

**15 Device fabrication and characterization:** Inverted organic solar cells (IOSCs) were constructed with a device structure of ITO/PEO:Zn-doped TiO<sub>2</sub> (ZTO)/active layer/MoO<sub>3</sub>/Al. Patterned ITO-coated glass substrates were cleaned by a sequence of sonication in acetone, isopropyl alcohol and deionized water respectively for 15 minutes and UV-ozone cleaning for 10 minutes. A thin layer of PEO-modified ZTO (30 nm) was spin coated onto the ITO substrates and annealed at 500 °C for 2 hours in air. The PEO-modified ZTO substrates were transferred into a glove box. The PTB7:PC<sub>71</sub>BM blend solution was prepared with a weight ratio of 1:1.5 in a mixed solvent of chlorobenzene/1,8-diodooctane (97:3 vol.%). The active layer (PTB7:PC<sub>71</sub>BM) was then spin-coated on the PEO-modified ZTO layer and the thickness was about 80 nm. After that the organic layer was slowly dried in vacuum, a layer of MoO<sub>3</sub> (10 nm)/Al (100 nm) as electrode was thermally evaporated on top of the

---

active layer through a shadow mask under a pressure of  $\sim 10^{-6}$  Torr. The effective area of the device was measured to be 0.0196 cm<sup>2</sup>.

Ultraviolet photoelectron spectroscopy (UPS) measurement was performed using AXIS Ultra DLD (KRATOS Inc.) with He I (21.2 eV) as monochromatic light source. X-ray photoelectron spectroscopy (XPS, AXIS-HSi) spectra was used to identify the surface elements and their chemical state. Photoluminescence (PL) spectra of the samples were measured using a Monochromator (SP2150i) and an excitation wavelength 375 nm. Surface topography was studied using atomic force microscopy (Park systems, XE-100). The optical properties were studied using the absorbance spectra recorded using Beckman DU-70 spectrophotometer. The thickness of the films were measured using a Dektak XT surface profiler. The electrical resistivity was measured by a four-point probe method. The mobility was measured by bottom-gate top-contact thin film transistor (TFT) method with semiconductor parameter analyzer (Agilent 4155C). Current density – voltage (J-V) characteristics of the devices were recorded using a Keithley 237 source measurement unit using a 100 mW/cm<sup>2</sup> AM 1.5G solar simulator (Newport, 91160A). Light intensity was calibrated using a standard silicon solar cell as a reference. The incident photon to charge carrier efficiency (IPCE) spectra of the devices were recorded using a lock-in amplifier (Model 7265, Signal Recovery) and a monochromatic light from a xenon lamp through the monochromator (SpectroPro-150, Acton Research Corporation).

20

25

30

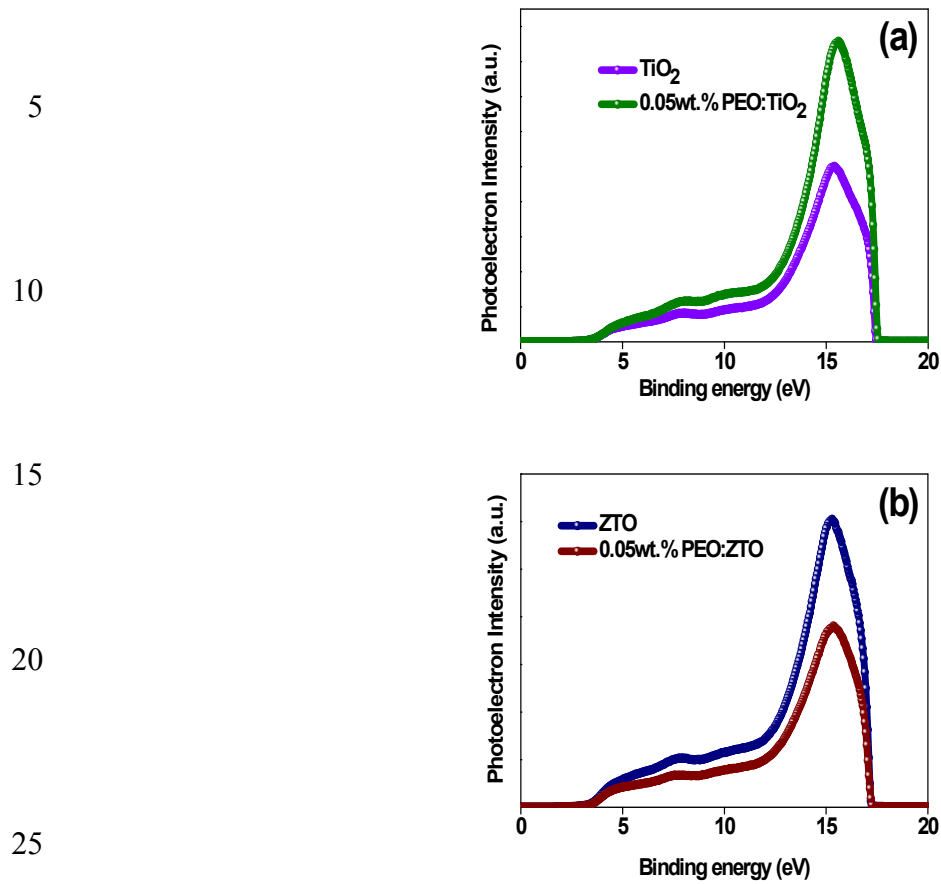

Figure S1. UPS spectra of (a)  $\text{TiO}_2$ ,  $0.05\text{wt.}\% \text{PEO}:\text{TiO}_2$  and (b) ZTO,  $0.05\text{wt.}\% \text{PEO}:\text{ZTO}$  films

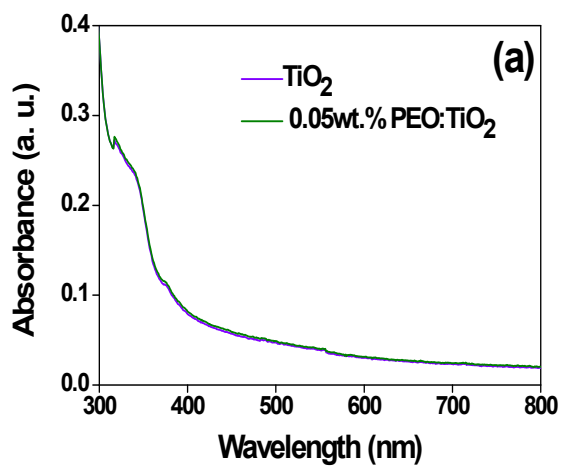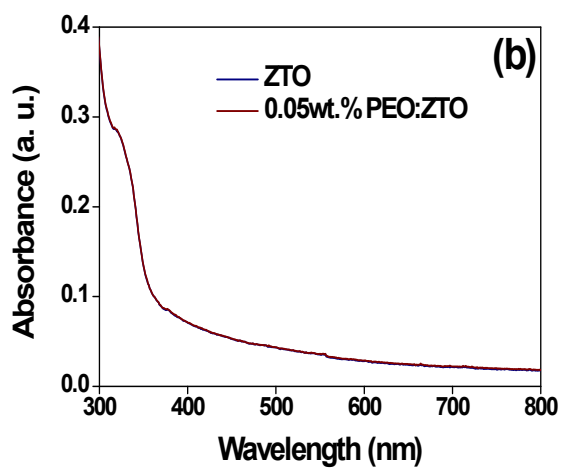

Figure S2. Absorption spectra of (a) TiO<sub>2</sub>, 0.05wt.% PEO:TiO<sub>2</sub> and (b) ZTO, 0.05wt.% PEO:ZTO films

---

**Table S1:** Valance band, conduction band and band gap of TiO<sub>2</sub>, 0.05wt.% PEO:TiO<sub>2</sub>, ZTO and 0.05wt.% PEO:ZTO films.

| ETLs                            | Valence band maximum (VBM) [eV] | Conduction band minimum (VBM) [eV] | Band gap (E <sub>g</sub> ) [eV] |
|---------------------------------|---------------------------------|------------------------------------|---------------------------------|
| TiO <sub>2</sub>                | -7.66                           | -4.46                              | 3.20                            |
| 0.05 wt.% PEO: TiO <sub>2</sub> | -7.61                           | -4.41                              | 3.20                            |
| ZTO                             | -7.90                           | -4.60                              | 3.30                            |
| 0.05 wt.% PEO: ZTO              | -7.92                           | -4.62                              | 3.30                            |

5

10

15

20

25

30

35

5

10

15

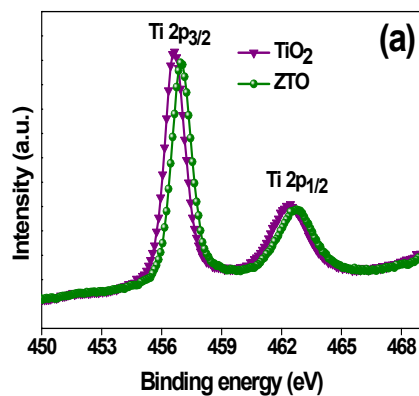

20

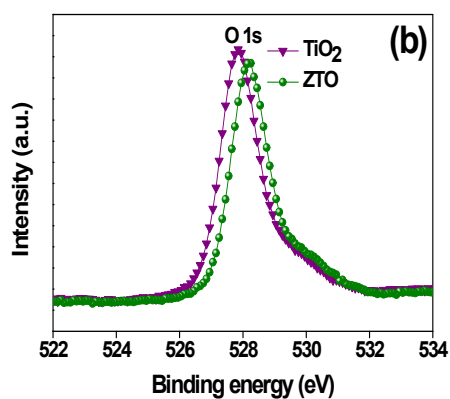

25

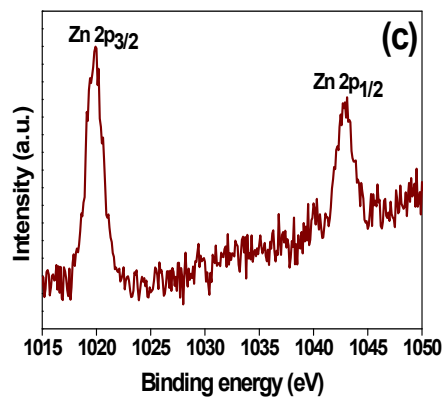

30

**Figure S3.** XPS spectra of TiO<sub>2</sub> and ZTO films (a) Ti2p, (b) O1s and (c) Zn2p

35

5

10

15

20

25

30

35

40

45

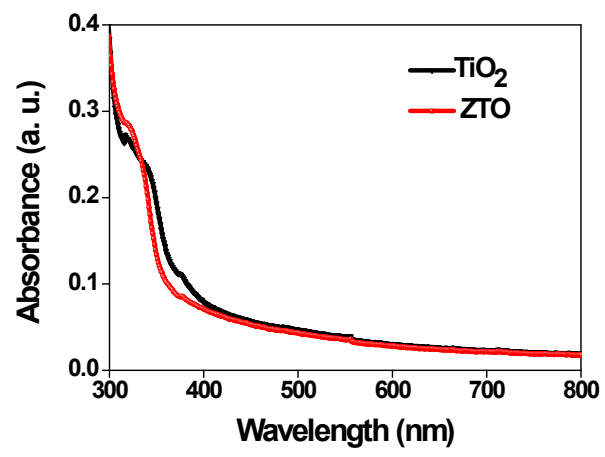

Figure S4: Absorption spectra of TiO<sub>2</sub> and ZTO films



5

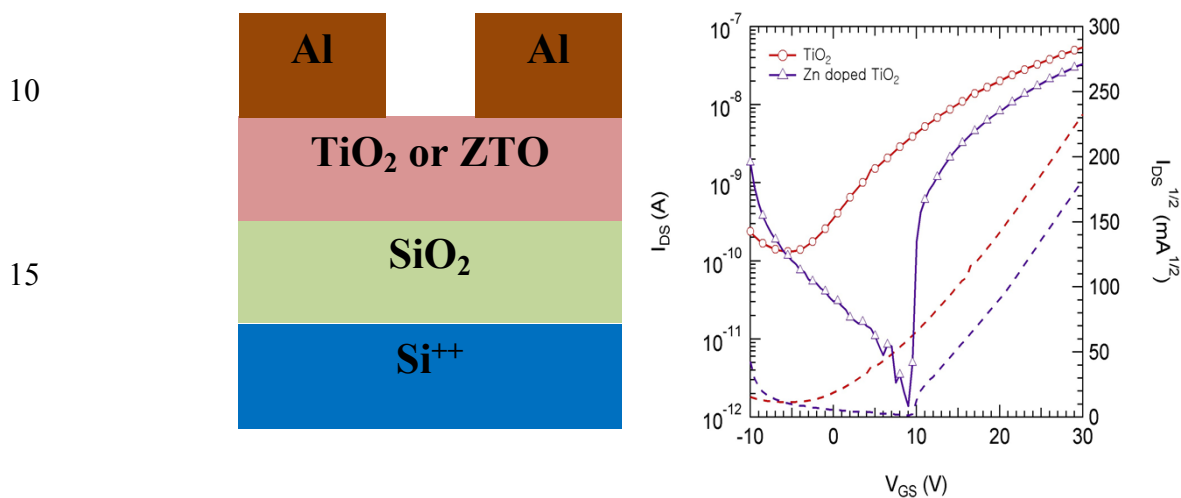

**Figure S5.** TFT device structure and transfer characteristics of TiO<sub>2</sub> and ZTO TFTs

20

The mobility has been measured by bottom-gate top-contact thin film transistor (TFT) method. The TFT device structure is shown in figure S5; SiO<sub>2</sub> was used as the gate dielectric layer, and Al was used as the source/drain electrode. Transfer characteristics of the TiO<sub>2</sub> and ZTO thin film transistors (TFTs) are shown in figure S5. The mobility TiO<sub>2</sub> and ZTO thin films are  $3.15 \times 10^{-4} \text{ cm}^2 \text{ V}^{-1} \text{ s}^{-1}$  and  $25.320 \times 10^{-4} \text{ cm}^2 \text{ V}^{-1} \text{ s}^{-1}$ .

5

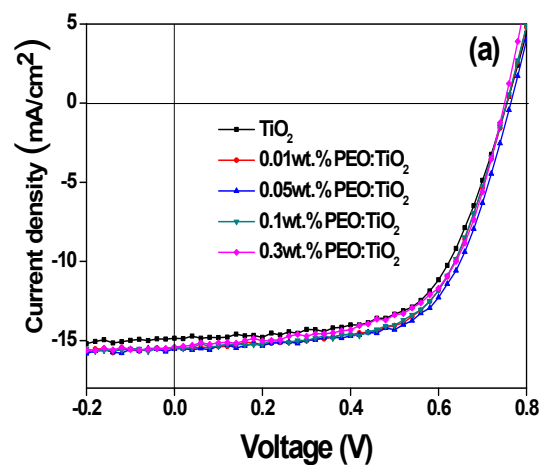

10

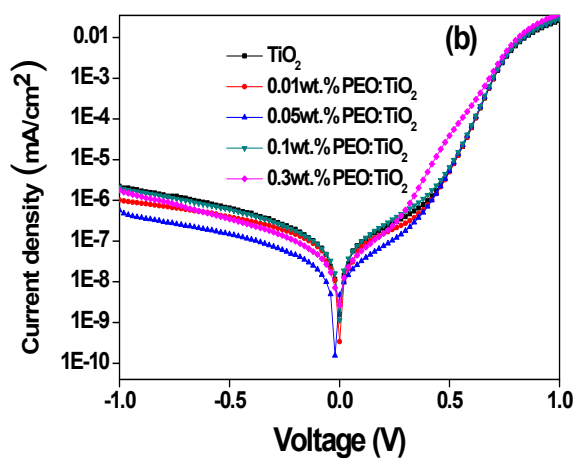

15

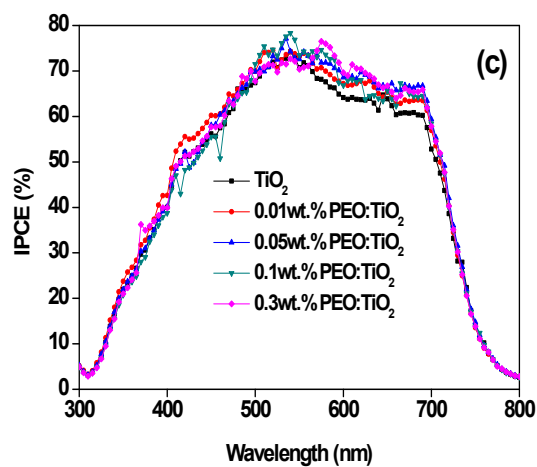

20

**Figure S6.** (a) Illuminated J-V, (b) dark J-V characteristics and (c) IPCE spectra of PTB7:PC<sub>71</sub>BM based IOSCs with ETLs of TiO<sub>2</sub> and PEO:TiO<sub>2</sub>.

25

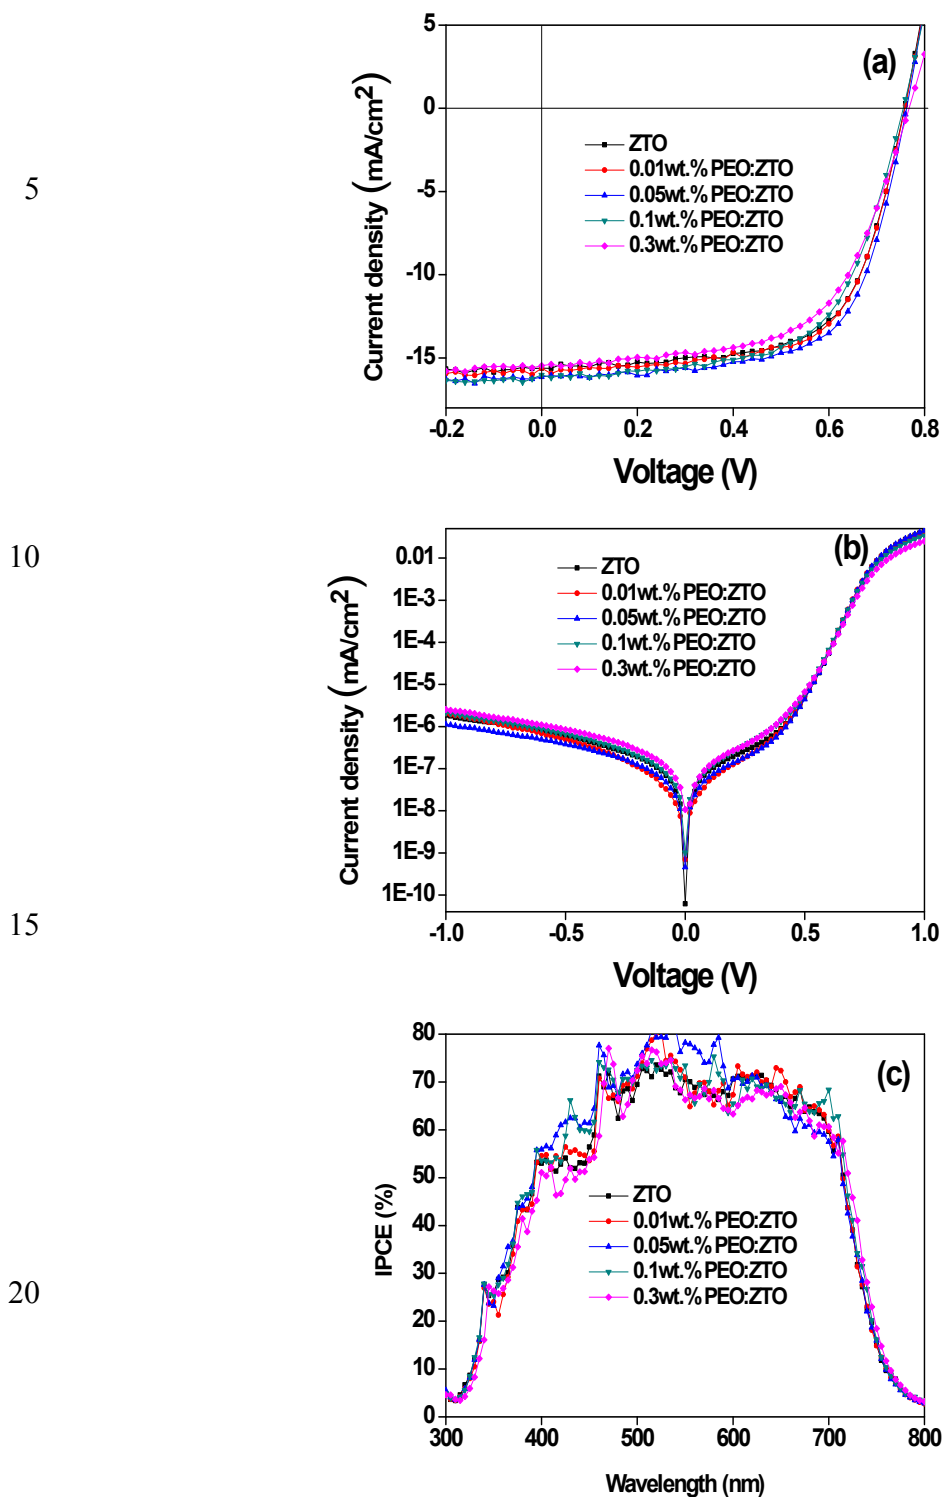

**Figure S7.** (a) Illuminated J-V, (b) dark J-V characteristics and (c) IPCE spectra of PTB7:PC<sub>71</sub>BM based IOSCs with ETLs of ZTO and PEO:ZTO.

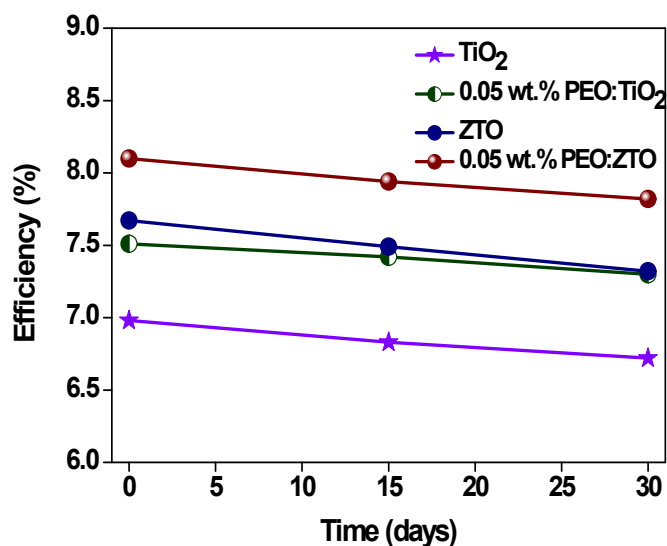

**Figure S8.** The stability of the PTB7:PC<sub>71</sub>BM based inverted device fabricated using TiO<sub>2</sub>, 0.05 wt.% PEO:TiO<sub>2</sub>, ZTO and 0.05 wt.% PEO:ZTO as an electron transport layer

The use of metal oxides on both sides of the PTB7:PC<sub>71</sub>BM layer prevents the diffusion of moisture into the active layer. The stability of the inverted PTB7:PC<sub>71</sub>BM solar cells (with MoO<sub>3</sub> as the hole transport layer and TiO<sub>2</sub>, 0.05 wt.% PEO:TiO<sub>2</sub>, ZTO or 0.05 wt.% PEO:ZTO as the electron transport layer) is shown in Figure S8. The solar cells were exposed continuously to air at room temperature (without any encapsulation barrier). We observed that TiO<sub>2</sub>, 0.05 wt.% PEO:TiO<sub>2</sub> based devices almost retains its original efficiency even after 30 days under ambient conditions with reduction of power conversion efficiency (PCE) from 6.98 to 6.72 % and 7.51 to 7.30 %, while for the device fabricated using ZTO and 0.05 wt.% PEO:ZTO ETL the PCE decreased 7.67 to 7.32 % and 8.10 to 7.82 % under the same conditions. This clearly shows that TiO<sub>2</sub>, PEO:TiO<sub>2</sub>, ZTO and PEO:ZTO based devices exhibit good stability.

5

10

15

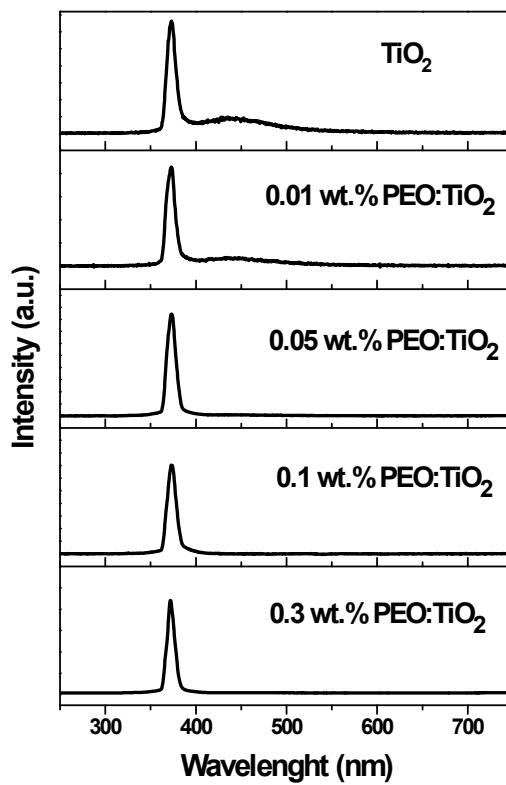

**Figure S9:** PL spectra of TiO<sub>2</sub> and PEO:TiO<sub>2</sub> films

20

25

5

10

15

20

25

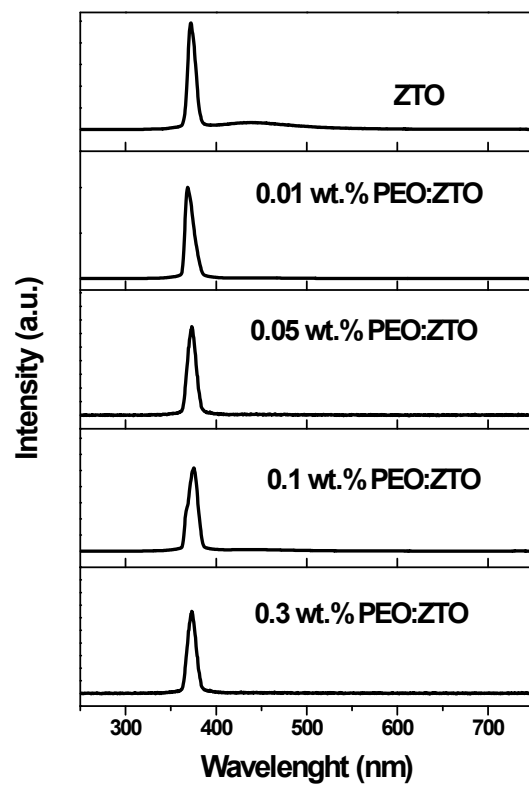

**Figure S10:** PL spectra of ZTO and PEO:ZTO films

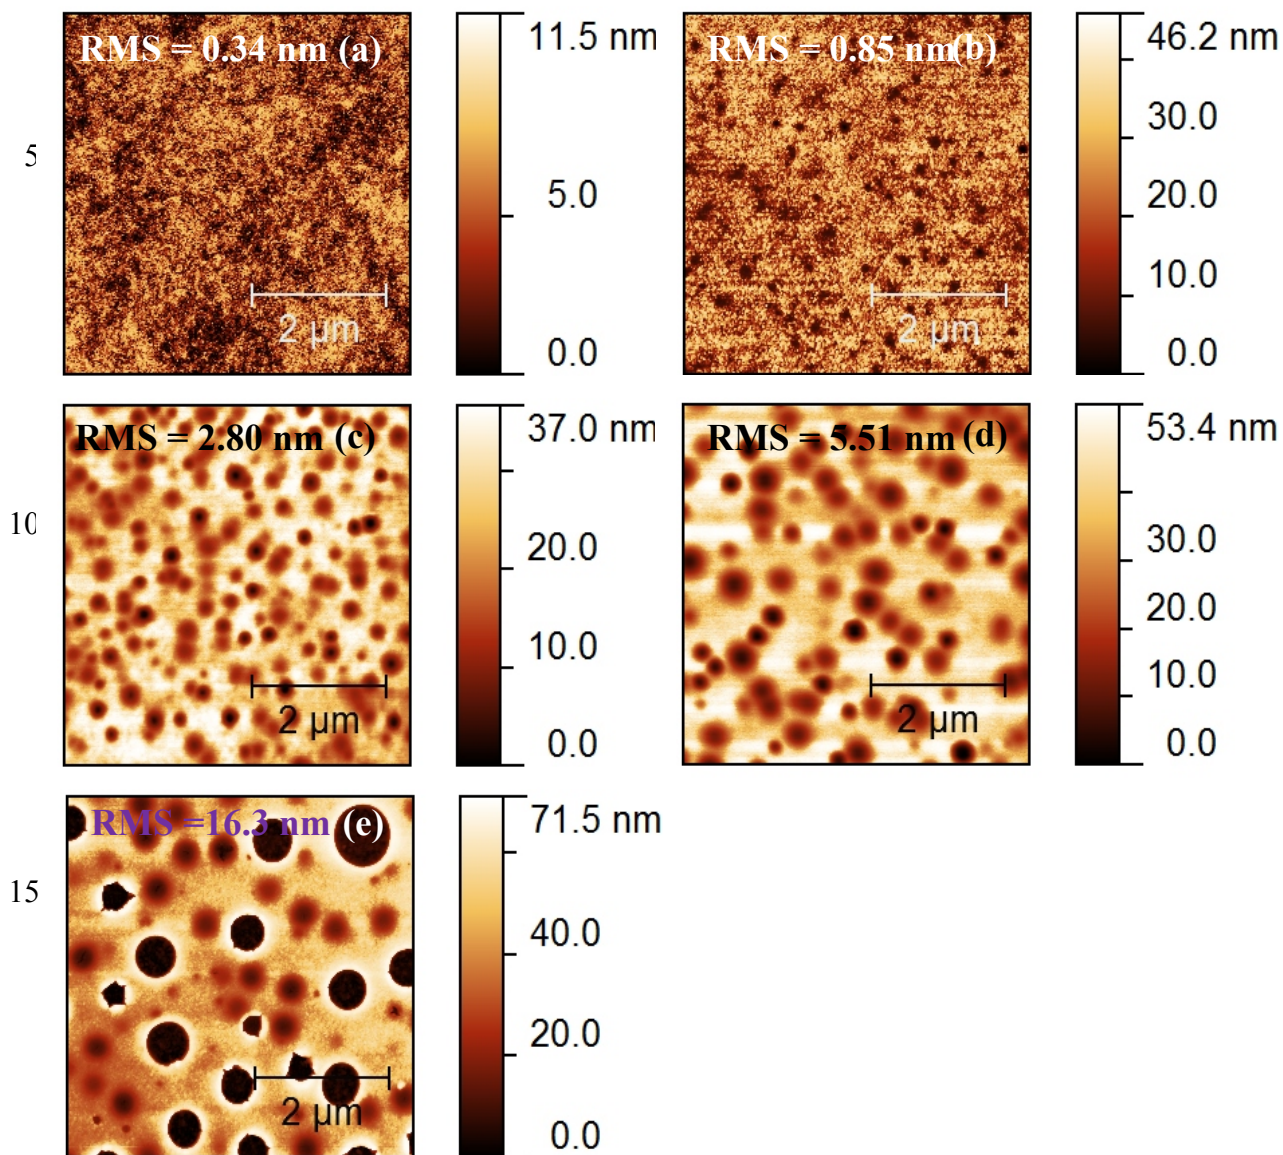

20 **Figure S11:** AFM images of (a)  $\text{TiO}_2$  and PEO: $\text{TiO}_2$  films (b) 0.01 wt.% PEO, (c) 0.05 wt.% PEO, (d) 0.1 wt.% PEO, (e) 0.3 wt.% PEO



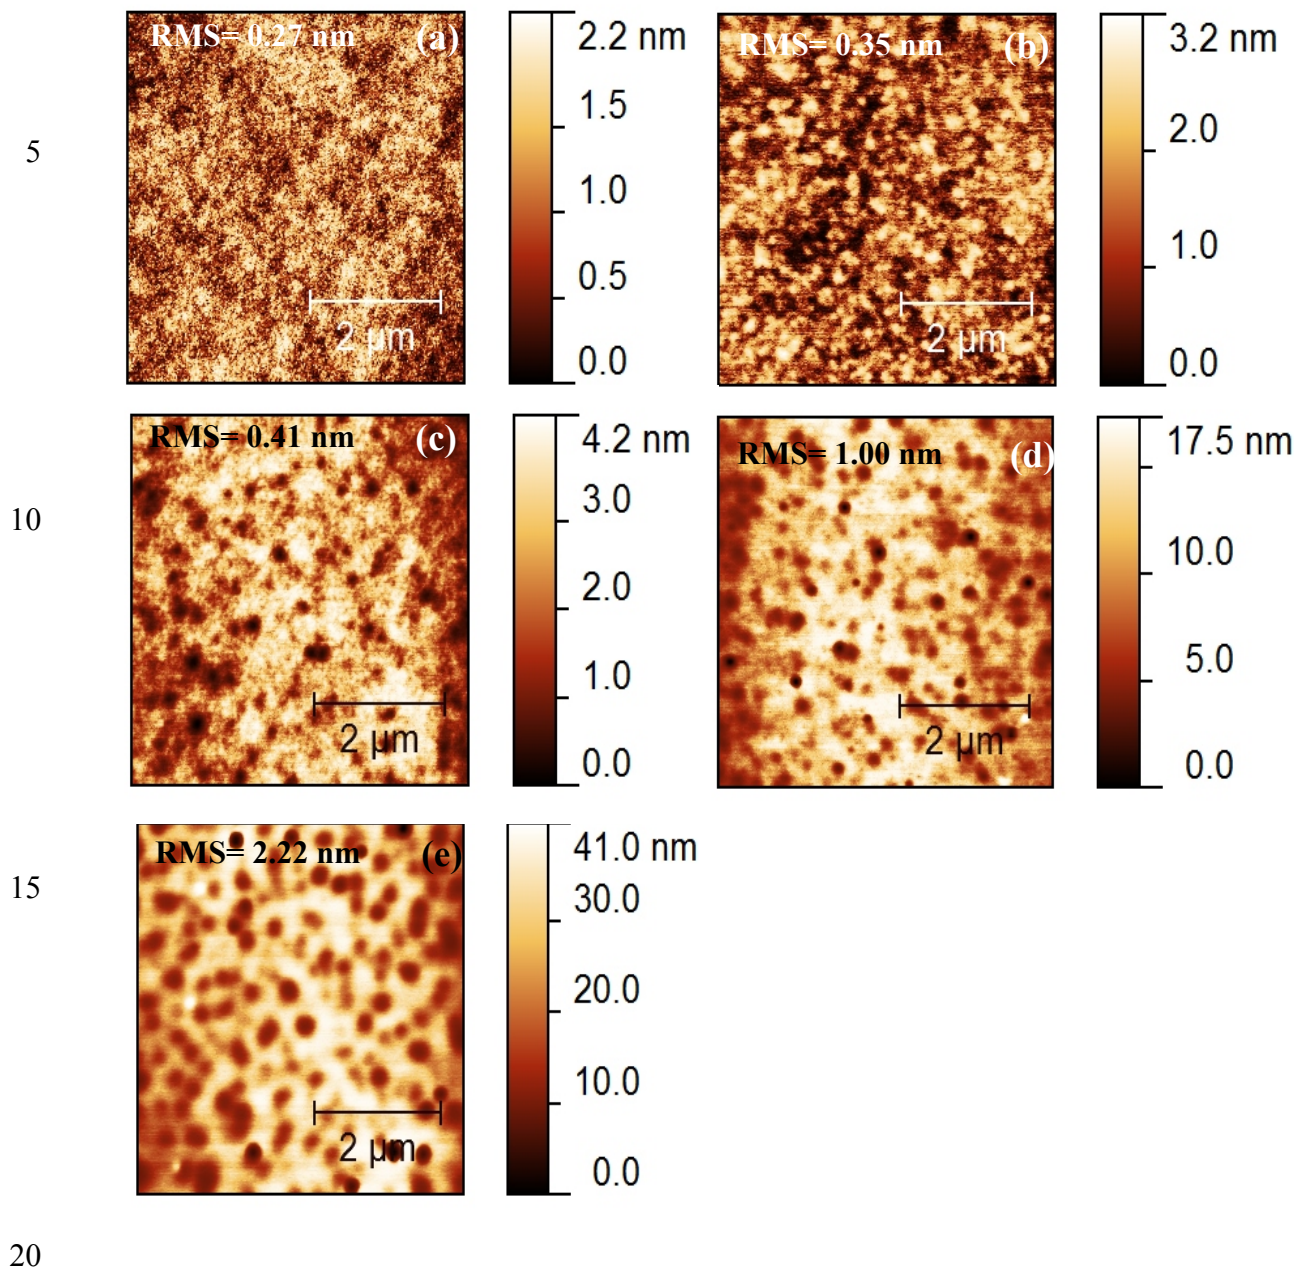

**Figure S12:** AFM images of (a) ZTO and PEO:ZTO films (b) 0.01 wt.% PEO, (c) 0.05 wt.% PEO, (d) 0.1 wt.% PEO, (e) 0.3 wt.% PEO
